# Supplementary material
Source: PubMed Central journal article supplement (PMC5087287)
Supplement: koni-05-10-1183860-s001.pdf [file koni-05-10-1183860-s001.pdf]

## **Supplementary Information:**

**Supplementary Table 1. Estimation of cytokine transcript levels in HeLa and HS-5 cells after 5-AC treatment using Human common cytokines PCR array.** (A) HeLa cells were treated with 2  $\mu$ M 5-AC for 7 days and then the levels of 84 common cytokines were estimated with qRT-PCR. As differentially expressed genes were considered genes with  $> 2$  log fold change in the gene expression compared to untreated control. The samples were measured in duplicates. (B) HS-5 cells were treated with 0.5  $\mu$ M 5-AC for 7 days and then the levels of 84 common cytokines were estimated using qRT-PCR. As differentially expressed genes were considered genes with  $> 2$  log fold change in the gene expression compared to untreated control. The samples were measured in duplicates.

**Supplementary Table 1.**

**A) Human common cytokines PCR array for HeLa after 5-AC treatment.**

|         | fold induction | std.dev. | p-value |
|---------|----------------|----------|---------|
| IL6     | <b>123,95</b>  | 0,90     | 0,100   |
| IL8     | <b>48,56</b>   | 0,89     | 0,204   |
| IL24    | <b>36,91</b>   | 3,51     | 0,175   |
| IL11    | <b>26,78</b>   | 0,53     | 0,343   |
| OSM     | <b>26,50</b>   | 0,00     | 0,403   |
| IL20    | <b>21,98</b>   | 0,97     | 0,341   |
| INHBA   | <b>8,94</b>    | 0,11     | 0,587   |
| TGFA    | <b>7,10</b>    | 0,54     | 0,604   |
| SPP1    | <b>5,09</b>    | 0,00     | 0,653   |
| CSF2    | <b>4,91</b>    | 0,00     | 0,660   |
| GDF5    | <b>4,64</b>    | 0,51     | 0,696   |
| FAM3B   | <b>3,82</b>    | 0,00     | 0,709   |
| TNF     | <b>3,68</b>    | 3,42     | 0,539   |
| CSF1    | <b>3,41</b>    | 0,19     | 0,698   |
| IL17B   | <b>3,37</b>    | 0,00     | 0,734   |
| IL1B    | <b>3,30</b>    | 1,62     | 0,656   |
| TNFSF14 | <b>2,83</b>    | 1,28     | 0,798   |
| IL23A   | <b>2,60</b>    | 0,00     | 0,788   |
| BMP4    | <b>2,60</b>    | 0,01     | 0,810   |
| IL1A    | <b>2,53</b>    | 0,11     | 0,792   |
| TNFSF4  | <b>2,32</b>    | 0,26     | 0,807   |
| IL12A   | <b>2,31</b>    | 0,89     | 0,746   |
| LTB     | <b>2,22</b>    | 0,01     | 0,822   |
| PDGFA   | <b>2,19</b>    | 1,17     | 0,750   |
| CSF3    | <b>2,17</b>    | 0,00     | 0,827   |
| IL1RN   | <b>2,07</b>    | 0,00     | 0,837   |
| THPO    | <b>2,02</b>    | 0,00     | 0,842   |
| IL3     | <b>-2,24</b>   | 0,000    | 0,820   |
| IFNA4   | <b>-2,34</b>   | 0,00     | 0,806   |
| BMP5    | <b>-4,94</b>   | 0,46     | 0,650   |

**B) Human common cytokines PCR array for HS-5 after 5-AC treatment.**

|          | fold induction | std.dev. | p-value |
|----------|----------------|----------|---------|
| OSM      | <b>32,27</b>   | 0,75     | 0,005   |
| IL20     | <b>19,27</b>   | 1,03     | 0,051   |
| IL24     | <b>6,95</b>    | 0,43     | 0,028   |
| GDF5     | <b>6,04</b>    | 1,12     | 0,158   |
| IL18     | <b>5,92</b>    | 1,28     | 0,145   |
| IL23A    | <b>5,88</b>    | 0,07     | 0,007   |
| BMP7     | <b>5,83</b>    | 0,95     | 0,039   |
| PDGFA    | <b>5,52</b>    | 0,57     | 0,070   |
| IL1RN    | <b>5,39</b>    | 0,54     | 0,163   |
| IL5      | <b>5,23</b>    | 0,08     | 0,015   |
| TNF      | <b>4,5</b>     | 0,07     | 0,026   |
| INHBA    | <b>4,42</b>    | 0,72     | 0,025   |
| CSF2     | <b>4,37</b>    | 0,14     | 0,017   |
| TGFB2    | <b>4,3</b>     | 0,03     | 0,018   |
| IL11     | <b>3,97</b>    | 0,02     | 0,059   |
| IL7      | <b>3,5</b>     | 0,68     | 0,028   |
| IL17B    | <b>3,44</b>    | 1,05     | 0,138   |
| TGFA     | <b>3,38</b>    | 0,16     | 0,014   |
| IL10     | <b>3,33</b>    | 1,56     | 0,307   |
| TNFSF13  | <b>3,29</b>    | 0,28     | 0,036   |
| IL21     | <b>3,24</b>    | 0,03     | 0,042   |
| GDF9     | <b>3,16</b>    | 0,11     | 0,024   |
| BMP5     | <b>3,01</b>    | 0,18     | 0,001   |
| BMP1     | <b>2,83</b>    | 0,05     | 0,032   |
| VEGFA    | <b>2,75</b>    | 0,71     | 0,051   |
| BMP3     | <b>2,71</b>    | 1,94     | 0,399   |
| IL15     | <b>2,68</b>    | 0,45     | 0,053   |
| FAM3B    | <b>2,61</b>    | 0,76     | 0,065   |
| LTB      | <b>2,59</b>    | 0,06     | 0,117   |
| IL12A    | <b>2,5</b>     | 0,16     | 0,046   |
| IFNG     | <b>2,46</b>    | 0,30     | 0,077   |
| IL16     | <b>2,46</b>    | 0,002    | 0,070   |
| IL6      | <b>2,42</b>    | 0,20     | 0,005   |
| TXLNA    | <b>2,19</b>    | 0,41     | 0,021   |
| IFNA2    | <b>2,18</b>    | 0,70     | 0,072   |
| IFNB1    | <b>2,08</b>    | 0,11     | 0,092   |
| TNFSF14  | <b>2,05</b>    | 0,33     | 0,127   |
| TNFSF13B | <b>-2,10</b>   | 0,27     | 0,1197  |

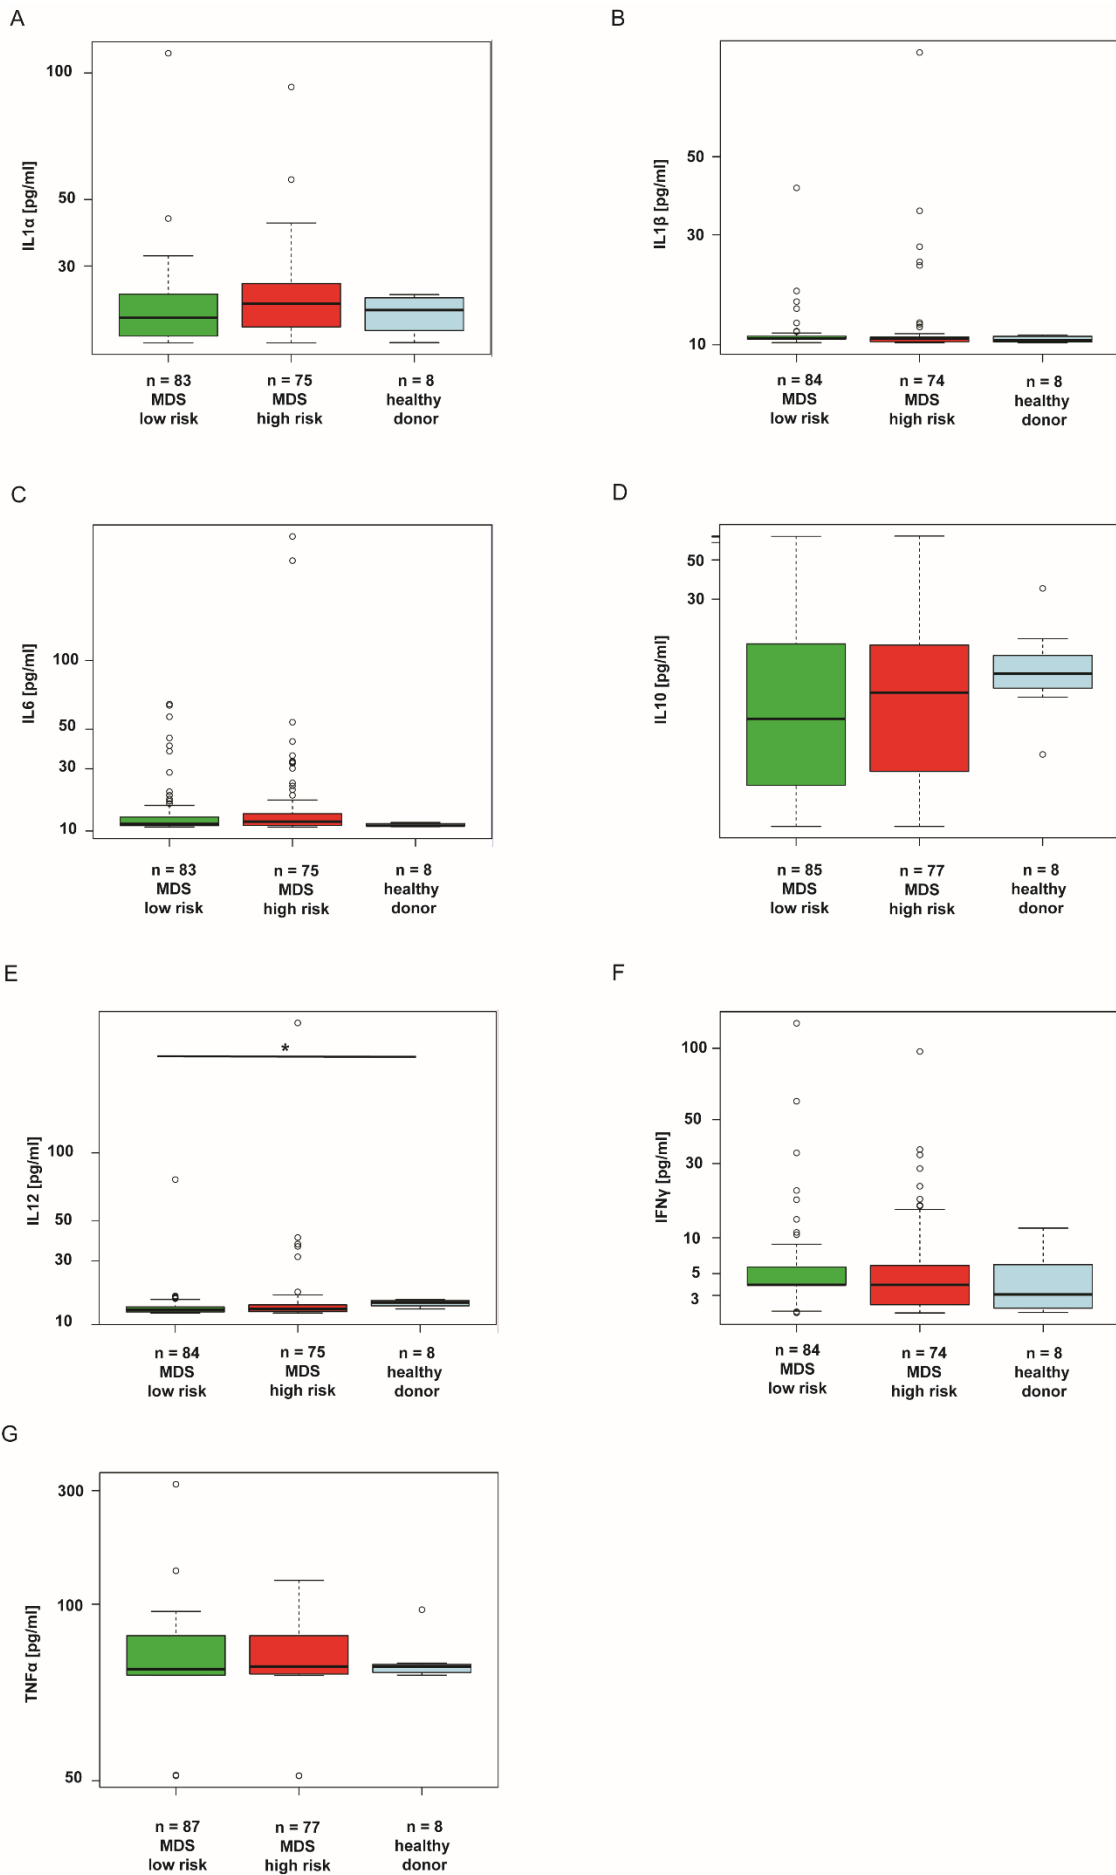

**Supplementary Figure 1. Comparison of changes in cytokine levels among low-risk MDS, high-risk MDS and/or AML and healthy donors**

**Supplementary Figure 1. Comparison of changes in cytokine levels among low-risk MDS, high-risk MDS and/or AML and healthy donors.** The data set was analyzed by robust linear mixed effects model at the 95% confidence interval. The box plot graphs demonstrate the upper and lower quartiles, and the median is represented by a short black line within the box for each group. The empty circles represent numerically distant measurements for individual patients (outliers; outside 1.5 times the interquartile range above the upper quartile and below the lower quartile). The p-value signifies the difference for the given cytokine measurements between all 3 groups. IL1a (p = 0.72); IL1b (p = 0.43); IL6 (p = 0.18); IL10 (p = 0.38); IL12p70 (p = 0.02); IFNg (p = 0.41); TNFa (p = 0.36).

A

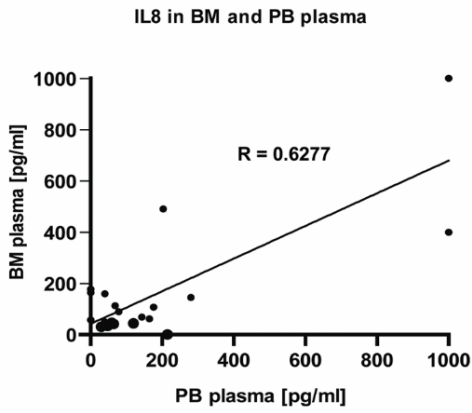

B

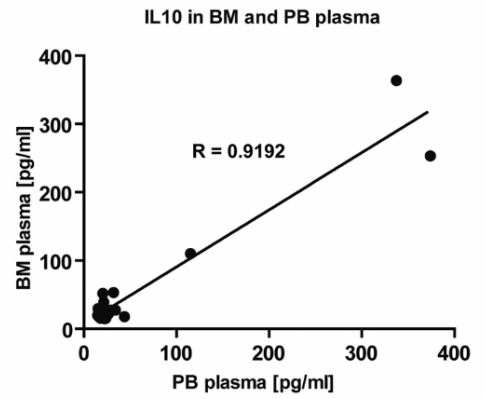

C

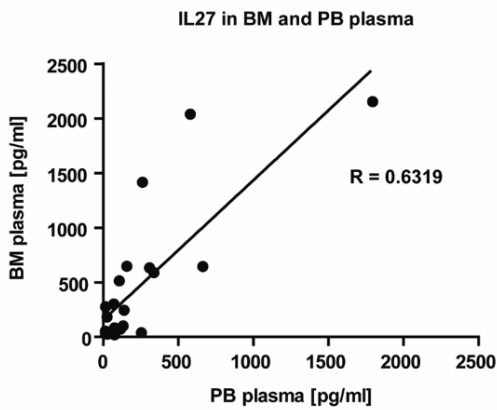

D

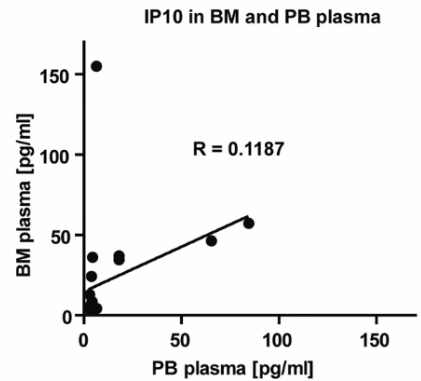

E

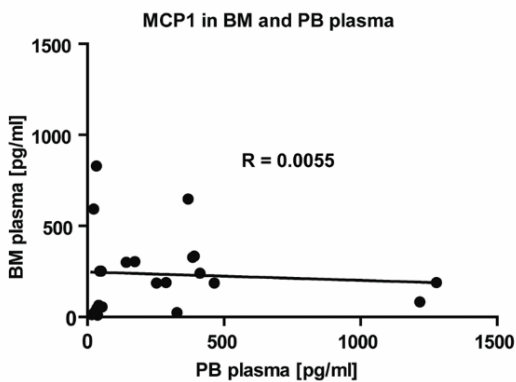

F

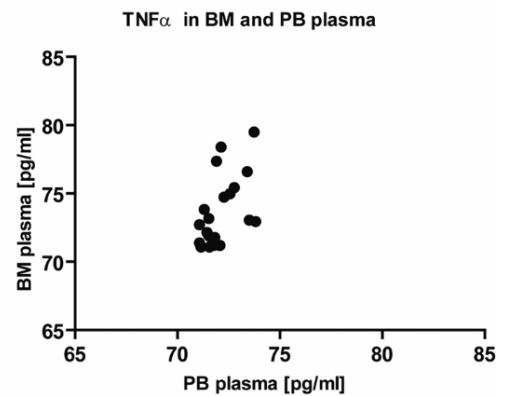

### Supplementary Figure 2. Simultaneous estimation of cytokine levels in PB and BM plasma.

BM and PB plasma collected at the same time point for the given patient was analyzed for IL8 (A), IL10 (B), IL27 (C), IP10 (D), MCP1 (E), and TNF $\alpha$  (F). In order to minimize the inter-sample variability, the corresponding samples were handled together and measured on the same 11-plex plate.
